# Supplementary material for: High PTX3 expression is associated with a poor prognosis in diffuse large B‐cell lymphoma
Source: PubMed Central journal article supplement — Cancer Sci. 2021 Nov 29;113(1):334–48. doi: 10.1111/cas.15179 (PMC8748251; doi:10.1111/cas.15179), 2021-11-29

## **SUPPLEMENTARY MATERIAL**

### **Distribution of markers in reactive tonsils**

The distribution of markers in reactive tonsils is relevant for understanding the functions of cells in immune responses and because DLBCL is a hematological neoplasia originating from germinal centers of lymphoid follicles. CD68+ and MITF+ cells (macrophages) were widely distributed in control tissue. CD16+ cells were scarce and only identified in the lymphoepithelium<sup>29</sup>. CD163+ cells predominated in the interfollicular regions. PTX3+ cells had a macrophage morphology in all areas, while positive centroblasts were also found in the germinal centers. IL10+ cells were scarce in all areas. Double immunohistochemistry showed a mutually exclusive distribution between CD163 with CD16 and partially exclusive distribution with MITF.

**Suppl. Table 1. Correlation between the clinicopathological characteristics and the survival of the patients.**

| Characteristics                                              | OS                 |           |        |     | PFS     |           |      |
|--------------------------------------------------------------|--------------------|-----------|--------|-----|---------|-----------|------|
|                                                              | p value            | HR        | 95% CI |     | p value | HR        | 95%  |
| <b>Histological</b>                                          |                    |           |        |     |         |           |      |
| CD3+                                                         | -                  | -         | -      | -   | -       | -         | -    |
| CD5+                                                         | 0.830              | 1.1       | 0.5    | 2.6 | 0.268   | 1.6       | 0.7  |
| CD20+                                                        | -                  | -         | -      | -   | -       | -         | -    |
| CD10+                                                        | 0.195              | 0.7       | 0.4    | 1.2 | 0.039   | 0.5       | 0.2  |
| BCL6+                                                        | 0.904              | 1.0       | 0.6    | 1.7 | 0.519   | 1.2       | 0.7  |
| MUM1+                                                        | 0.016              | 2.1       | 1.2    | 3.8 | 0.150   | 1.6       | 0.8  |
| Non-GCB (Hans classifier)                                    | 0.06* <sup>2</sup> | 1.7       | 1.0    | 3.0 | 0.036   | 2.0       | 1.0  |
| BCL2+                                                        | 0.002              | 2.9       | 1.5    | 5.6 | 0.024   | 2.2       | 1.1  |
| EBV EBER+                                                    | 0.09* <sup>1</sup> | 2.1       | 0.9    | 4.9 | 0.244   | 1.8       | 0.7  |
| RGS1-High                                                    | 0.308              | 1.4       | 0.8    | 2.5 | 0.589   | 0.8       | 0.5  |
| MYC-High**                                                   | 0.245              | 1.4       | 0.8    | 2.3 | 0.307   | 1.4       | 0.8  |
| <b>Molecular</b>                                             |                    |           |        |     |         |           |      |
| <i>BCL2</i> t+ (split FISH)                                  | 0.911              | 1.0       | 0.4    | 2.2 | 0.735   | 0.9       | 0.3  |
| <i>MYC</i> t+                                                | 0.679              | 1.2       | 0.5    | 2.6 | 0.173   | 1.7       | 0.8  |
| <i>BCL2</i> IHC+ and <i>MYC</i> -IHC-High (double expressor) | 0.002              | 2.4       | 1.4    | 4.1 | 0.008   | 2.2       | 1.2  |
| <i>MYC</i> t+ and/or <i>MYC</i> -IHC-High**                  | 0.050              | 1.8       | 1.0    | 3.2 | 0.421   | 1.3       | 0.7  |
| <i>MYD88</i> L265P mutation                                  | 0.915              | 1.0       | 0.5    | 2.3 | 0.642   | 0.8       | 0.3  |
| <b>Clinical</b>                                              |                    |           |        |     |         |           |      |
| Age >60                                                      | 0.013              | 2.3       | 1.2    | 4.4 | 0.388   | 1.3       | 0.7  |
| Sex, male                                                    | 0.763              | 0.9       | 0.6    | 1.5 | 0.975   | 1.0       | 0.6  |
| Location                                                     |                    |           |        |     |         |           |      |
| Nodal (+spleen)                                              |                    | reference |        |     |         | reference |      |
| Waldeyer's ring                                              | 0.377              | 0.7       | 0.3    | 1.5 | 0.612   | 0.8       | 0.4  |
| Gastrointestinal                                             | 0.056              | 0.4       | 0.1    | 1.0 | 0.177   | 0.5       | 0.2  |
| Other Extranodal                                             | 0.663              | 1.1       | 0.6    | 2.0 | 0.625   | 1.2       | 0.6  |
| LDH High                                                     | 0.002              | 2.7       | 1.5    | 5.2 | 0.003   | 3.0       | 1.5  |
| High sIL-2R                                                  | 0.042              | 2.9       | 1.0    | 8.0 | 0.149   | 2.1       | 0.8  |
| High performance status                                      | 0.100              | 2.0       | 0.9    | 4.6 | 0.515   | 1.3       | 0.6  |
| Extranodal >1 site                                           | 0.000              | 3.9       | 2.0    | 8.0 | 0.034   | 2.2       | 1.1  |
| Stage III-IV                                                 | 0.002              | 2.3       | 1.4    | 3.9 | 0.002   | 2.5       | 1.4  |
| B symptoms                                                   | 0.272              | 1.4       | 0.7    | 2.8 | 0.154   | 1.7       | 0.8  |
| IPI High Intermediate + High                                 | <0.001             | 3.6       | 2.0    | 6.4 | 0.002   | 2.6       | 1.4  |
| Treatment                                                    |                    |           |        |     |         |           |      |
| RCHOP                                                        |                    | reference |        |     |         | reference |      |
| RCHOP-like                                                   | 0.268              | 1.4       | 0.8    | 2.6 | 0.784   | 1.1       | 0.6  |
| Other                                                        | 0.140              | 2.2       | 0.8    | 6.1 | 0.255   | 2.0       | 0.6  |
| Clinical Response (CR)                                       | <0.001             | 4.8       | 2.7    | 8.3 | 0.000   | 22.2      | 11.1 |

\*\* The OS was calculated for cases with follow-up equal or below to 5 years.

\*1, in the Kaplan-meier analysis, Breslow test,  $p = 0.022$

\*2, in the Kaplan-meier analysis, Tarone-Ware test  $p = 0.048$ .

**Suppl. Table 2.1. Main pathological characteristics (validation series).**

| <b>Characteristics</b>    | <b>Frequency (%)</b> |      |
|---------------------------|----------------------|------|
| <b>Histological</b>       |                      |      |
| CD3+                      | 0/159                | 0.0  |
| CD5+                      | 24/154               | 15.6 |
| CD20+                     | 149/154              | 95.5 |
| CD10+                     | 40/153               | 26.1 |
| BCL6+                     | 116/151              | 76.8 |
| MUM1+                     | 133/152              | 87.5 |
| Non-GCB (Hans classifier) | 109/152              | 71.7 |
| BCL2+                     | 126/151              | 83.4 |
| EBV EBER+                 | 11/152               | 7.2  |
| RGS1-High                 | 44/130               | 33.8 |

**Suppl. Table 2.2. Main clinical characteristics (validation series).**

| <b>Clinical features</b>     | <b>Frequency (%)</b> |      |
|------------------------------|----------------------|------|
| Age >60                      | 116/159              | 73.0 |
| Sex, male                    | 86/159               | 54.1 |
| Location                     |                      |      |
| Nodal (+spleen)              | 60/159               | 37.7 |
| Waldeyer's ring              | 13/159               | 8.2  |
| Gastrointestinal             | 24/159               | 15.1 |
| Other Extranodal             | 62/159               | 39.0 |
| LDH High                     | 89/156               | 57.1 |
| High sIL-2R (>530)           | 114/149              | 76.5 |
| High performance status      | 34/141               | 24.1 |
| Extranodal >1 site           | 34/132               | 25.8 |
| Stage III-IV                 | 81/146               | 55.5 |
| B symptoms                   | 40/140               | 28.6 |
| IPI High Intermediate + High | 62/138               | 44.9 |
| Treatment                    |                      |      |
| RCHOP                        | 108/149              | 72.5 |
| RCHOP-like                   | 36/149               | 24.2 |
| Other                        | 5/149                | 3.4  |
| Clinical Response (CR)       | 98/136               | 72.1 |

**Suppl. Table 3. Correlation between markers with Double expressor status**

| Marker | <i>MYC and BCL2 IHC Double expressor</i> |          |      |          |      |
|--------|------------------------------------------|----------|------|----------|------|
|        | <i>p</i> value                           | Positive |      | Negative |      |
|        |                                          | Mean     | ±STD | Mean     | ±STD |
| CD68   | 0.491                                    | 14.6     | 8.2  | 15.6     | 8.7  |
| CD16   | 0.019                                    | 7.1      | 8.1  | 5.6      | 10.4 |
| MITF   | 0.814                                    | 2.7      | 2.3  | 3.2      | 3.1  |
| CD163  | 0.174                                    | 24.1     | 17.9 | 19.7     | 17.7 |
| PTX3   | 0.626                                    | 11.6     | 17.4 | 10.5     | 16.9 |
| IL10   | 0.279                                    | 12.2     | 11.4 | 7.9      | 9.7  |
| FOXP3  | 0.078                                    | 1.4      | 1.5  | 2.7      | 3.3  |
| CSF1R  | 0.609                                    | 23.6     | 22.9 | 27.2     | 26.7 |
| RGS1   | 0.680                                    | 13.3     | 17.1 | 8.3      | 9    |

BCL2 IHC positive (50%), MYC IHC >22% (digital quantification).

Mann-Whitney U Test (Non-parametric test).

**Suppl. Table 4. Correlation between markers with MYD88 L265P mutational status.**

| Marker | <i>MYD88 L265P mutation</i> |          |      |          |      |
|--------|-----------------------------|----------|------|----------|------|
|        | <i>p</i> value              | Positive |      | Negative |      |
|        |                             | Mean     | ±STD | Mean     | ±STD |
| CD68   | 0.874                       | 16.5     | 11.2 | 15.3     | 8.3  |
| CD16   | 0.392                       | 3.1      | 4.9  | 6.6      | 10.1 |
| MITF   | 0.251                       | 1.9      | 1.8  | 3.1      | 2.9  |
| CD163  | 0.841                       | 22.7     | 18.6 | 20.8     | 17.9 |
| PTX3   | 0.813                       | 11.2     | 14.4 | 11.3     | 17.3 |
| IL10   | 0.388                       | 11.7     | 9.1  | 9.3      | 10.6 |
| FOXP3  | 0.677                       | 1.1      | 0.8  | 2.4      | 3.0  |
| CSF1R  | 0.621                       | 19.0     | 14.0 | 27.8     | 26.8 |
| RGS1   | 0.871                       | 7.6      | 8.8  | 10       | 12.3 |

Mann-Whitney U Test (Non-parametric test).

**Suppl. Table 5. Correlation between markers with cell-of-origin (DLBCL NOS only).**

| Marker | Cell-of-origin (Hans' classifier) - DLBCL NOS |      |      |         |      |
|--------|-----------------------------------------------|------|------|---------|------|
|        | <i>p</i> value                                | GCB  |      | Non-GCB |      |
|        |                                               | Mean | ±STD | Mean    | ±STD |
| CD68   | 0.034                                         | 13.2 | 8.3  | 16.4    | 7.9  |
| CD16   | <0.001                                        | 2.3  | 5.5  | 8.8     | 11.1 |
| MITF   | 0.326                                         | 2.8  | 2.8  | 3.3     | 2.9  |
| CD163  | 0.018                                         | 17.2 | 18.9 | 23.2    | 16.4 |
| PTX3   | 0.036                                         | 7.1  | 12.6 | 13.5    | 18.5 |
| IL10   | <0.001                                        | 3.2  | 3.9  | 12.7    | 11.4 |
| FOXP3  | 0.567                                         | 2.4  | 3.5  | 2.1     | 2.3  |
| CSF1R  | 0.252                                         | 22.7 | 23.2 | 27.6    | 24.7 |
| RGS1   | 0.247                                         | 6.1  | 7.0  | 9.2     | 10.9 |

Mann-Whitney U Test (Non-parametric test).

**Suppl. Table 6. Correlation between markers with PD-L1.**

|       | PD-L1                   |                |
|-------|-------------------------|----------------|
|       | Correlation coefficient | <i>p</i> value |
| CD68  | 0.185                   | 0.184          |
| CD16  | 0.440                   | 0.002          |
| MITF  | 0.237                   | 0.109          |
| CD163 | 0.329                   | 0.016          |
| PTX3  | 0.103                   | 0.463          |
| IL10  | 0.468                   | 0.001          |
| FOXP3 | -0.148                  | 0.291          |
| CSF1R | 0.126                   | 0.367          |
| RGS1  | 0.432                   | 0.002          |

Bivariate correlation.



**1A**

# Survival analysis Training set

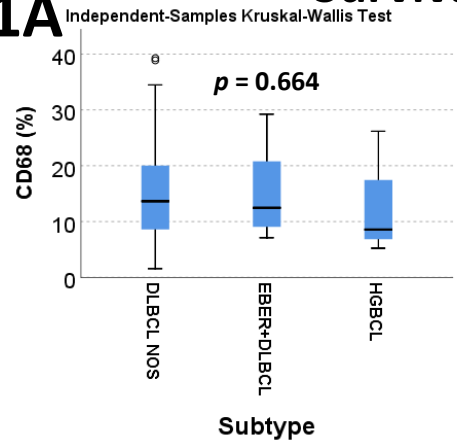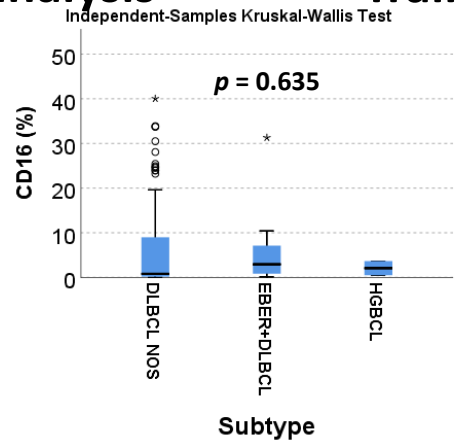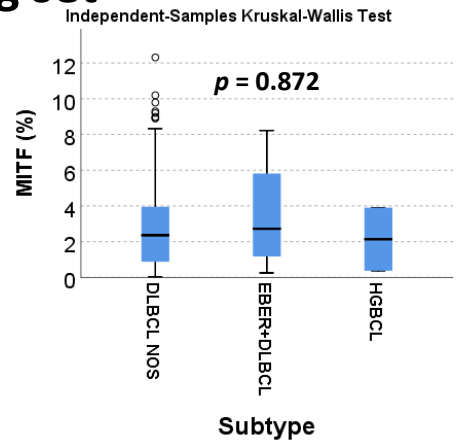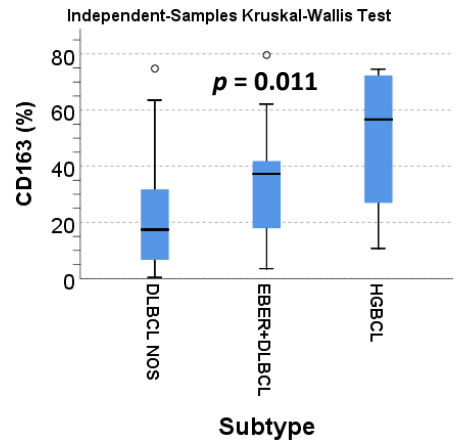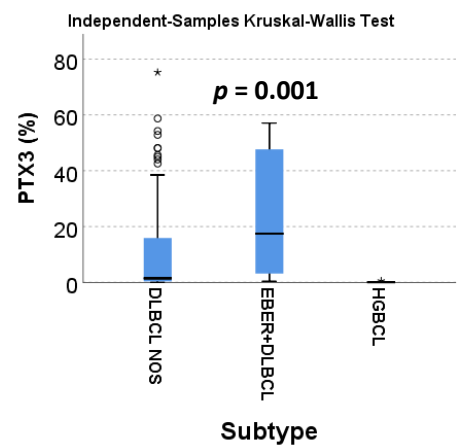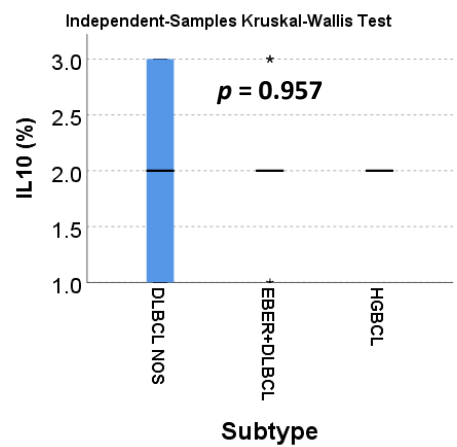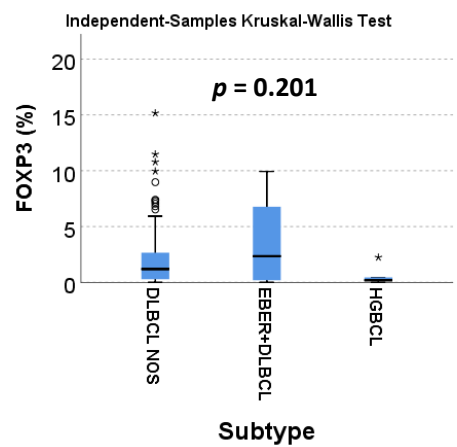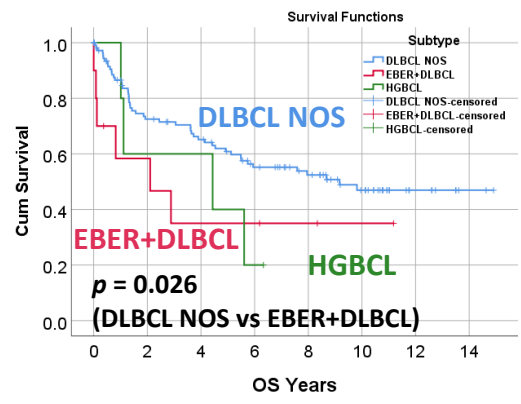**OS**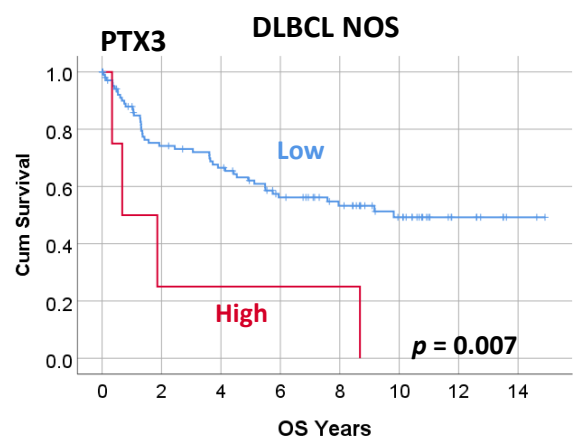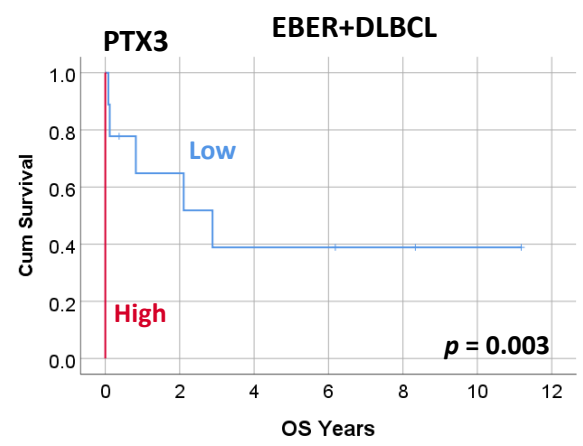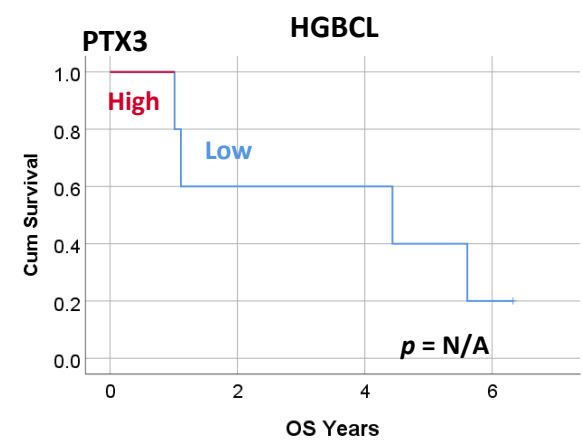



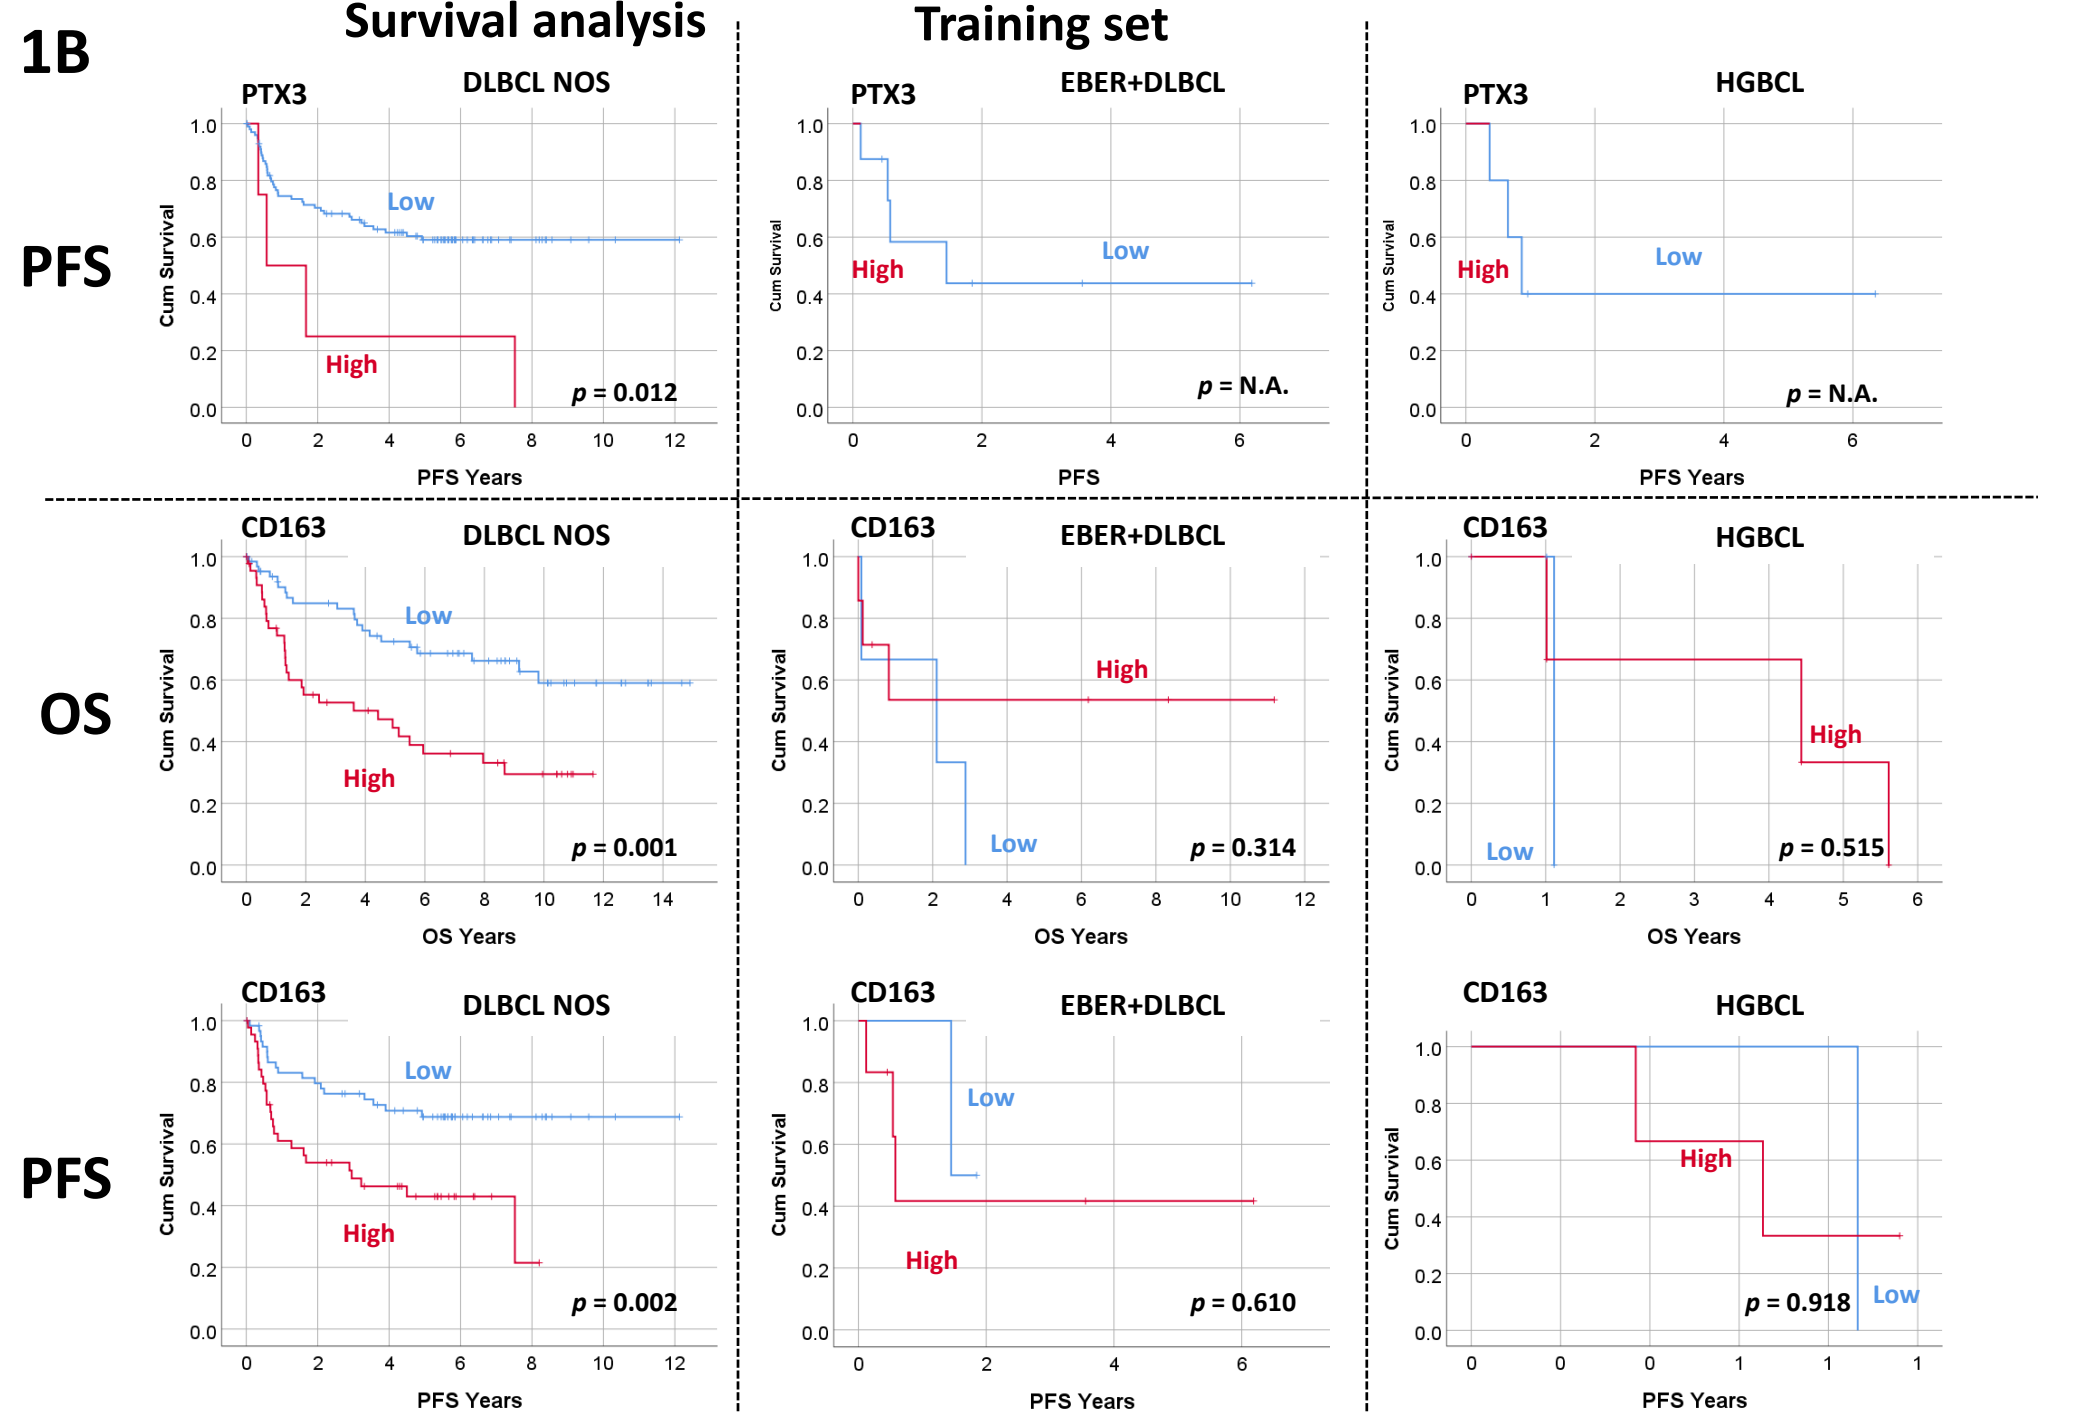

# 1C Survival analysis Training set

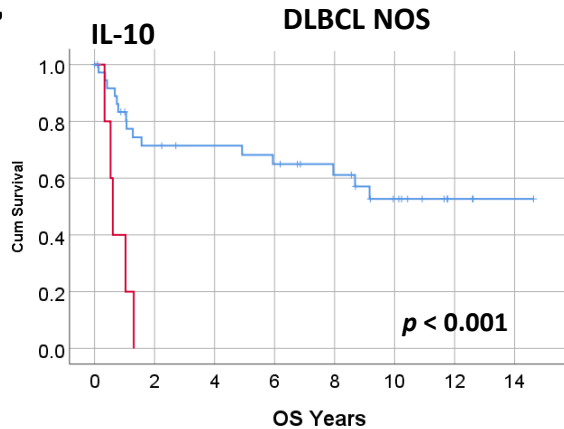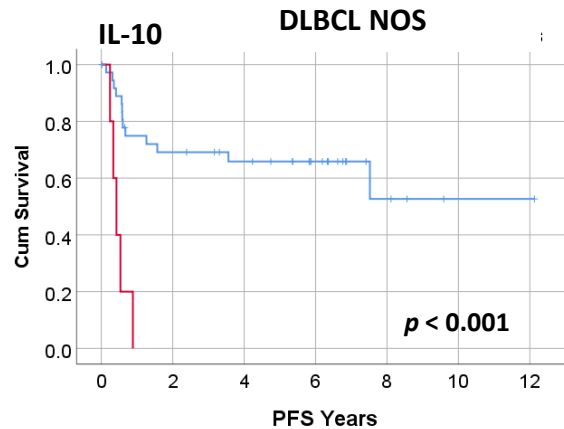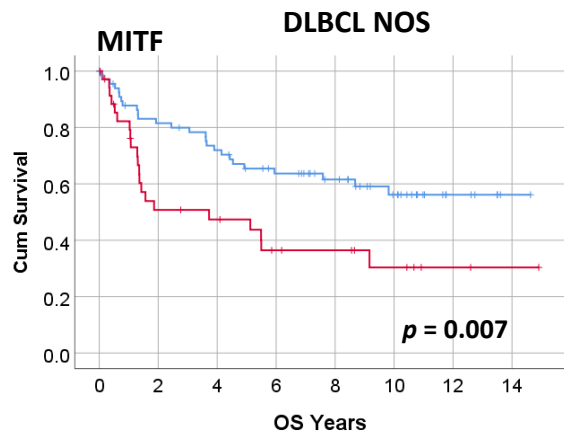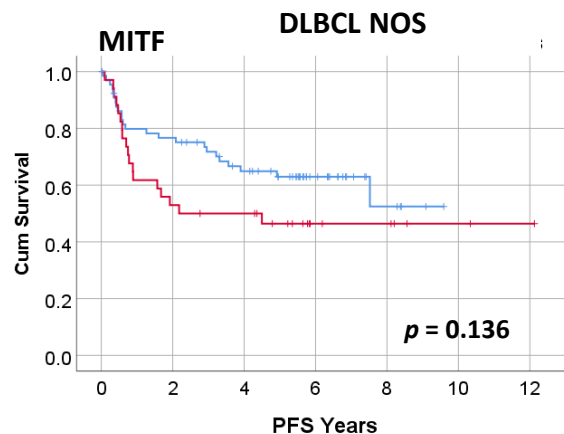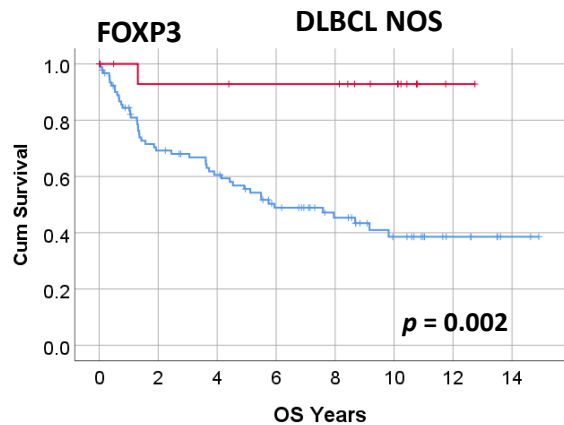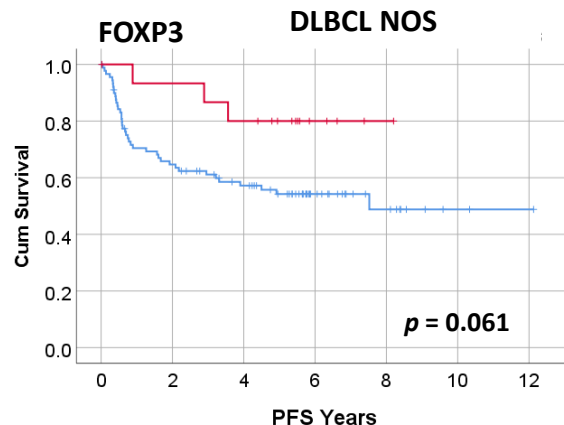

2A

# Validation set

## Overall Survival

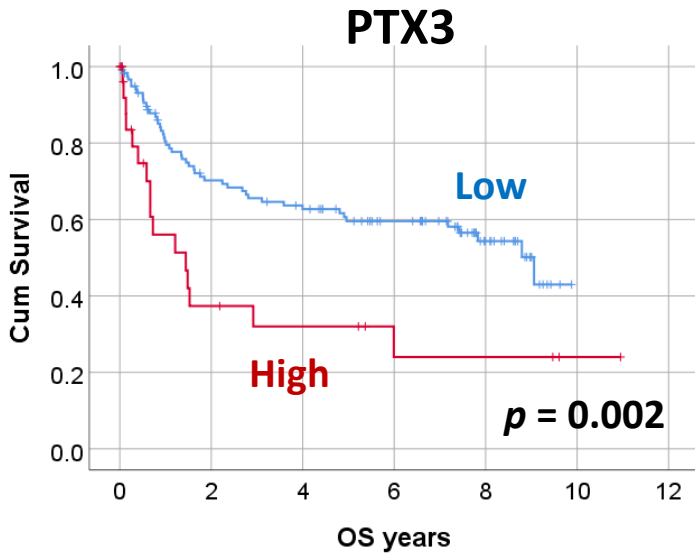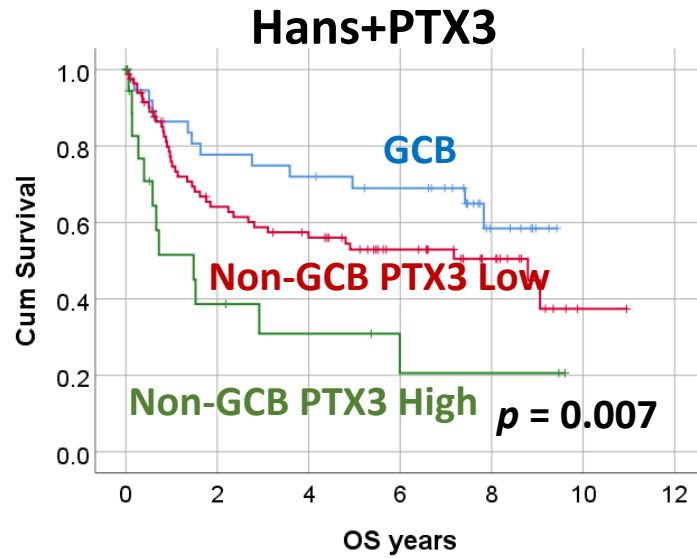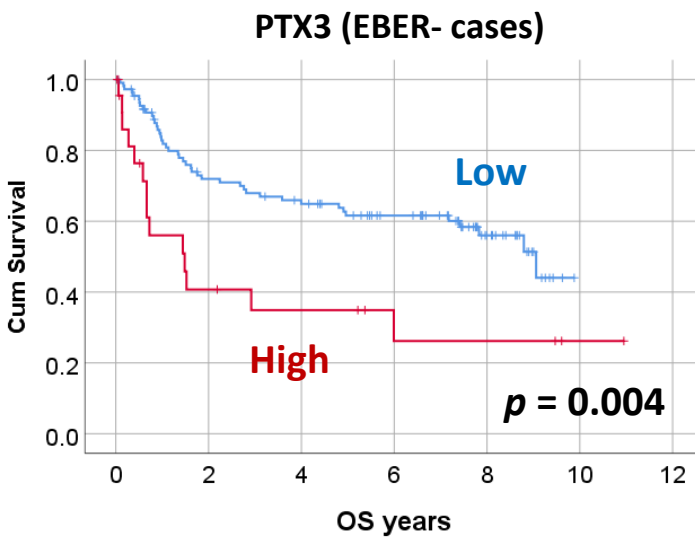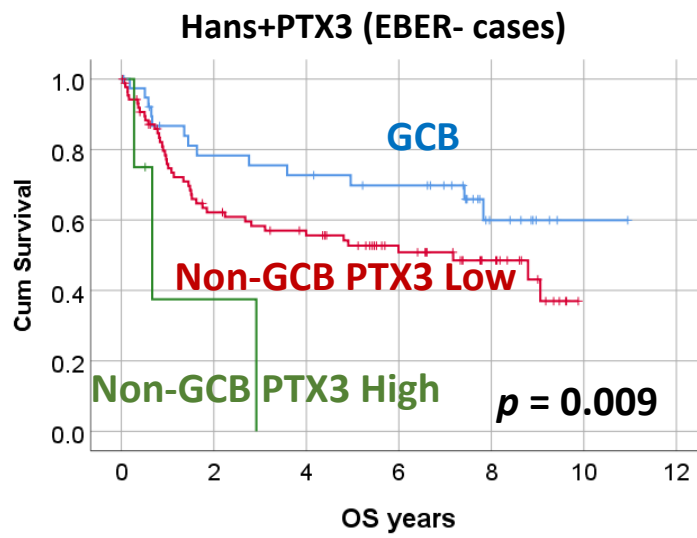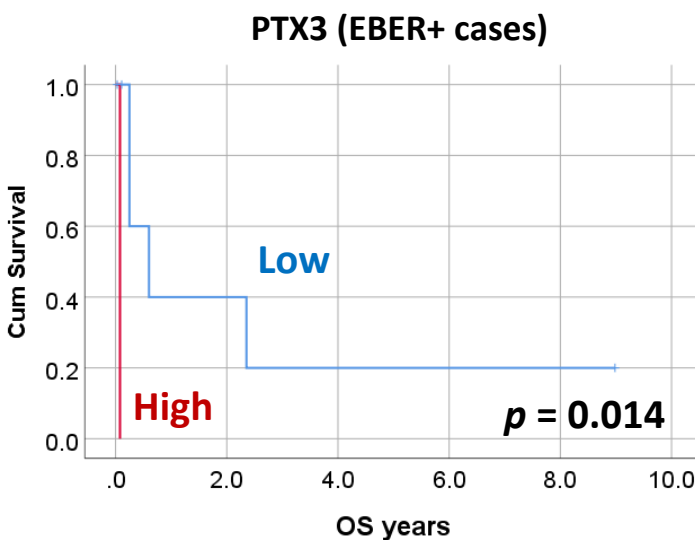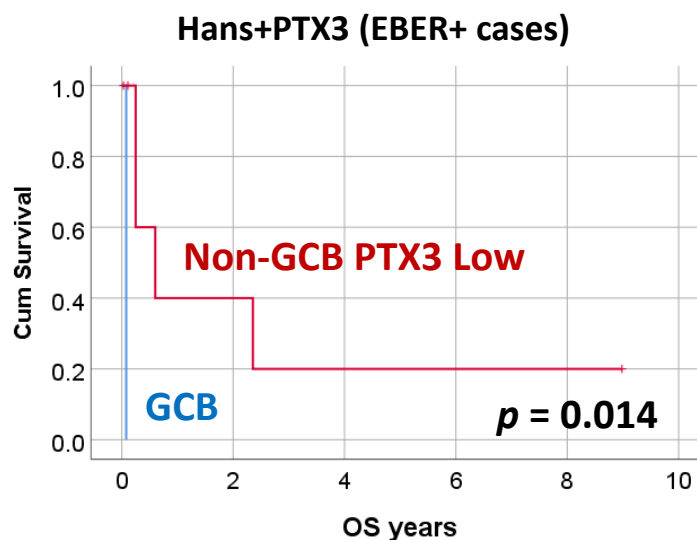

2B

# Validation set

## Progression Free Survival

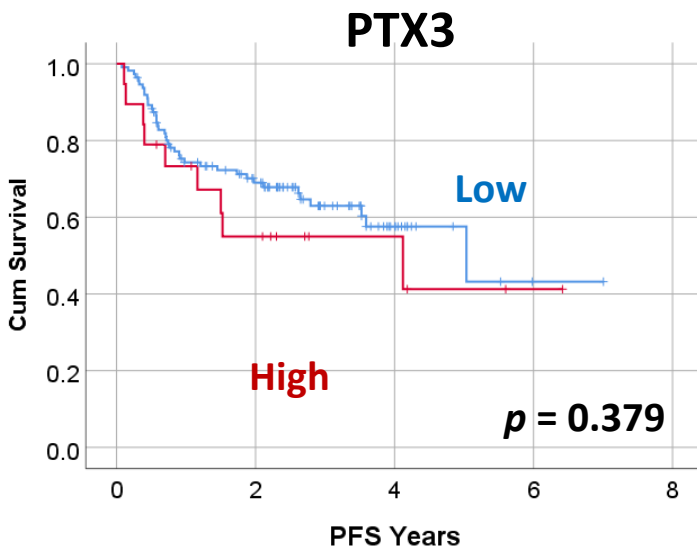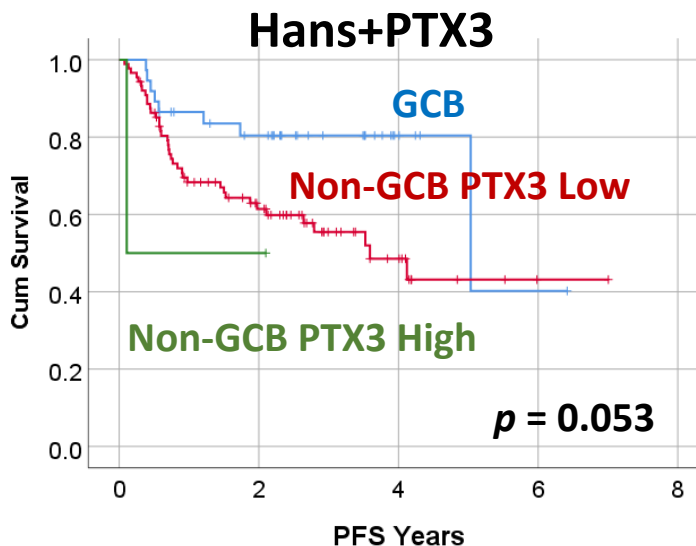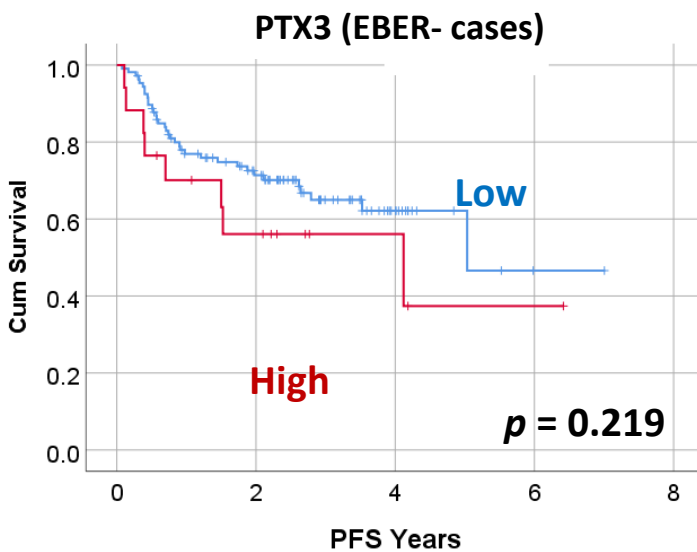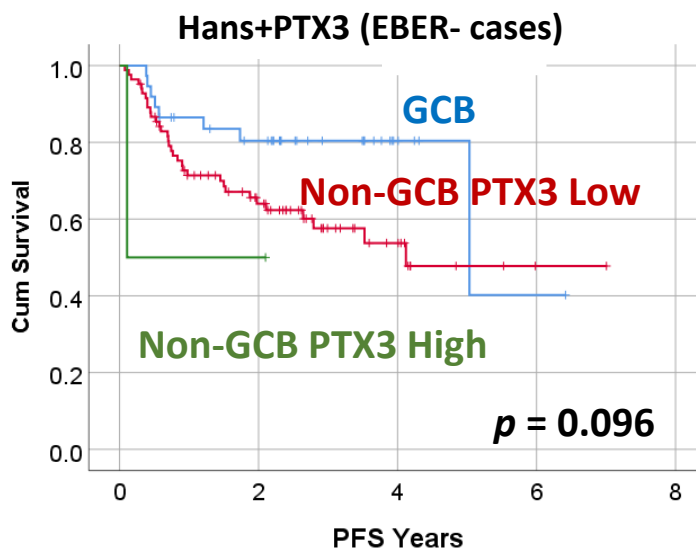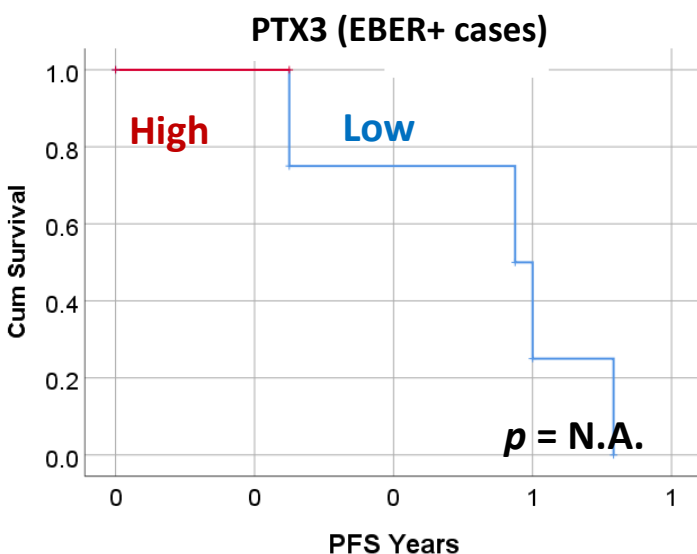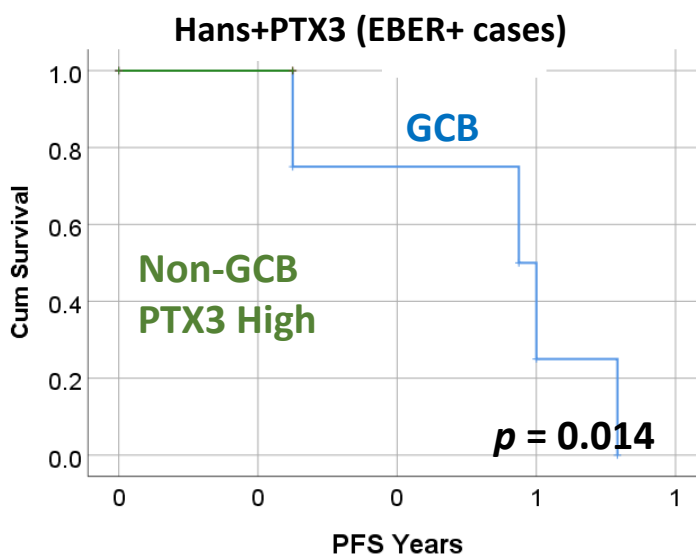

Supplement: CAS-113-334-s001.pdf [file CAS-113-334-s001.pdf]
